# Supplementary material for: Clinical features of COVID-19 in Italian outpatient children and adolescents during Parental, Delta, and Omicron waves: a prospective, observational, cohort study
Source: PubMed Central journal article supplement (PMC10450148; doi:10.3389/fped.2023.1193857), 2023-08-10
Supplement: Datasheet1.pdf [file Datasheet1.pdf]

## *Supplementary Material*

### **Clinical Features of COVID-19 in Italian Outpatient Children and Adolescents During Parental, Delta, and Omicron Waves: a prospective, observational, cohort study**

**Costanza Di Chiara<sup>\*</sup>, Riccardo Boracchini, Giulia Sturniolo, Alessia Barbieri, Paola Costenaro, Sandra Cozzani<sup>1</sup>, Marica De Pieri, Cecilia Liberati, Annachiara Zin, Andrea Padoan, Francesco Bonfante, Fatima Kakkar, Anna Cantarutti, Daniele Donà<sup>†</sup>, Carlo Giaquinto<sup>†</sup>**

<sup>†</sup>These authors contributed equally to this work and share last authorship

**\* Correspondence:** Costanza Di Chiara, [costanza.dichiara@phd.unipd.it](mailto:costanza.dichiara@phd.unipd.it)

#### **1 Supplementary Figures**

**Supplementary Figure 1.** Number of COVID-19 pediatric cases enrolled between April 2020 and December 2022 at the COVID-19 Family Cluster Follow-up Clinic (CovFC) of our institution. In gray boxes are presented the criteria for the definition of the baseline of infection for COVID-19 cases.

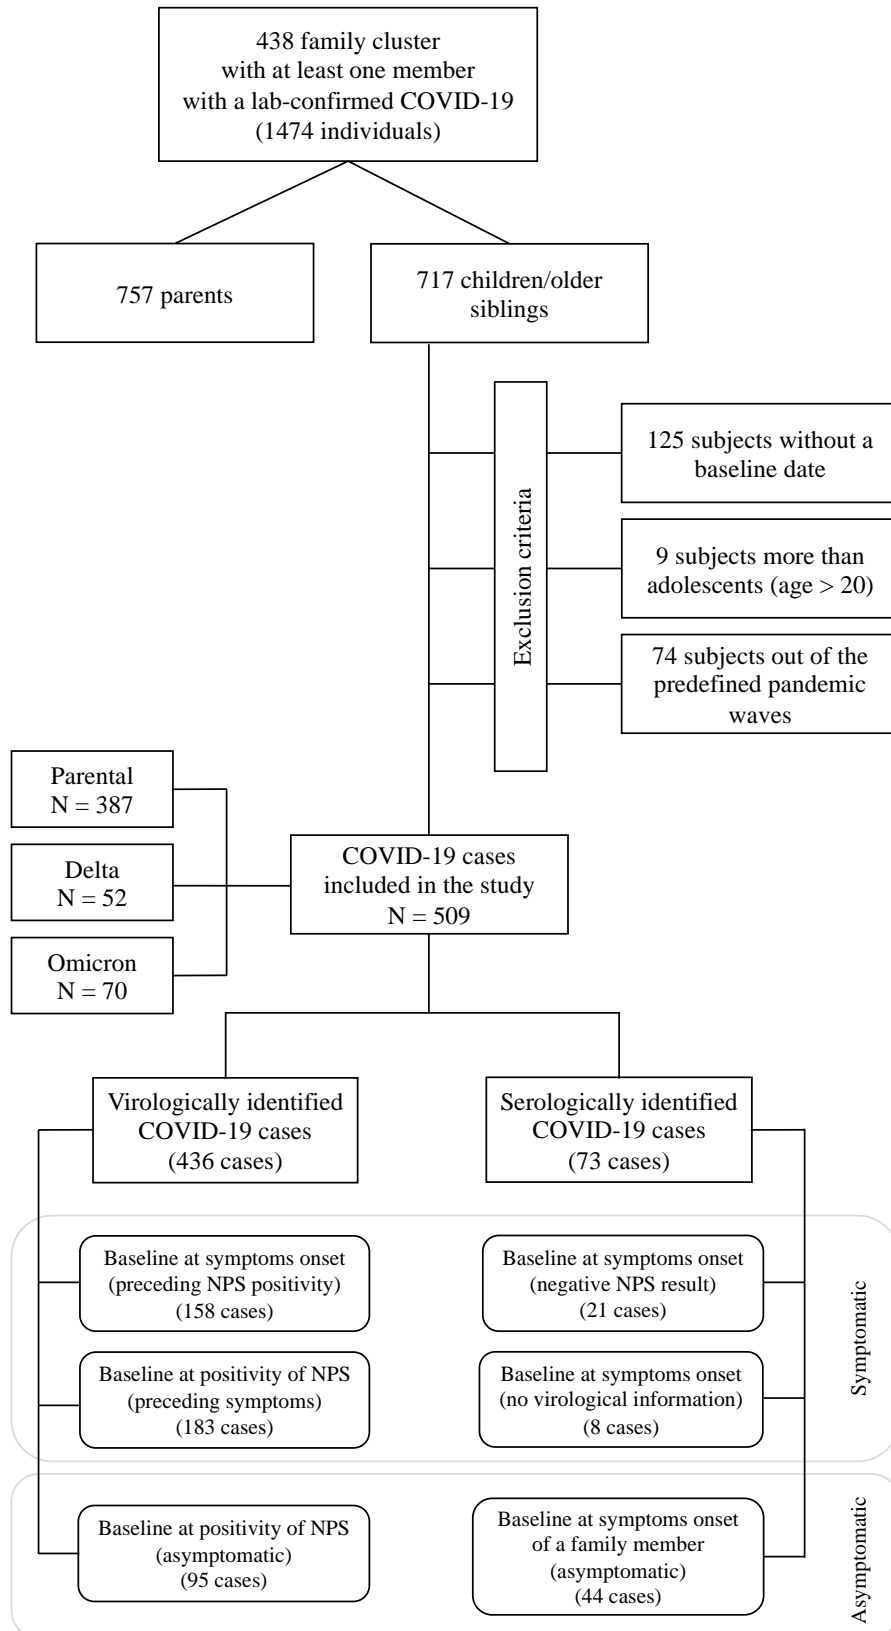

## 2 Supplementary Tables

**Supplementary Table 1.** Differences in clinical manifestations of SARS-CoV-2 infection between children who had previously received at least one dose of COVID-19 vaccine and those children who did not.

|                                  | Unvaccinated<br>(N = 47) | Vaccinated<br>(N = 23) | P - Value |
|----------------------------------|--------------------------|------------------------|-----------|
| <i>Symptoms, N (%)</i>           |                          |                        |           |
| Rhinitis                         | 17 (36.17)               | 9 (39.13)              | 0.8097    |
| Cough                            | 17 (36.17)               | 7 (30.43)              | 0.6349    |
| Dyspnea                          | 1 (2.13)                 | 1 (4.35)               | 0.4476    |
| Fever                            | 39 (82.98)               | 14 (60.87)             | 0.0427    |
| Otalgia                          | 0 (0)                    | 0 (0)                  | -         |
| Myalgia                          | 3 (6.38)                 | 2 (8.7)                | 0.339     |
| Arthralgia                       | 0 (0)                    | 2 (8.7)                | 0.1048    |
| Sore throat                      | 6 (12.77)                | 4 (17.39)              | 0.2397    |
| Hyposmia and/or ageusia          | 2 (4.26)                 | 1 (4.35)               | 0.4542    |
| Conjunctivitis                   | 1 (2.13)                 | 0 (0)                  | 0.6714    |
| Fatigue                          | 10 (21.28)               | 5 (21.74)              | 0.2415    |
| Headache                         | 10 (21.28)               | 6 (26.09)              | 0.6526    |
| Alteration of consciousness      | 0 (0)                    | 0 (0)                  | -         |
| Abdominal pain                   | 1 (2.13)                 | 0 (0)                  | 0.6714    |
| Nausea/vomiting                  | 4 (8.51)                 | 1 (4.35)               | 0.339     |
| Diarrhea                         | 4 (8.51)                 | 0 (0)                  | 0.1945    |
| Poor feeding                     | 3 (6.38)                 | 1 (4.35)               | 0.4067    |
| Lymphadenopathy                  | 0 (0)                    | 0 (0)                  | -         |
| Skin rash                        | 0 (0)                    | 0 (0)                  | -         |
| Pneumonia                        | 1 (2.13)                 | 0 (0)                  | 0.6714    |
| Other symptoms                   | 5 (10.64)                | 0 (0)                  | 0.1267    |
| <i>Number of symptoms, N (%)</i> |                          |                        |           |
| 0                                | 1 (2.13)                 | 1 (4.35)               | 0.0175    |
| 1                                | 9 (19.15)                | 5 (21.74)              |           |
| 2                                | 13 (27.66)               | 8 (34.78)              |           |
| ≥ 3                              | 24 (51.06)               | 9 (39.13)              |           |
| <i>Duration of symptoms</i>      |                          |                        |           |
| days                             | 2 (1 - 4)                | 3 (1 - 4)              | 0.7403    |

**Supplementary Table 2.** Clinical features of SARS-CoV-2 infection among different age groups (0-2 months, 3-11 months, 1-4 years, 5-11 years, and 12-20 years).

|                            |     | 0 - 2 months<br>(N=13) | 3 - 11 months<br>(N=36) | 1 - 4 years<br>(N=83) | 5 - 11 years<br>(N=248) | 12 - 20 years<br>(N=129) |
|----------------------------|-----|------------------------|-------------------------|-----------------------|-------------------------|--------------------------|
| Rhinitis                   |     | 5 (38.46)              | 7 (19.44)               | 24 (28.92)            | 40 (16.13)              | 29 (22.48)               |
| Fever                      |     | 10 (76.92)             | 22 (61.11)              | 45 (54.22)            | 99 (39.92)              | 62 (48.06)               |
| Myalgia                    |     | 2 (15.38)              | 5 (13.89)               | 20 (24.1)             | 28 (11.29)              | 20 (15.5)                |
| Arthralgia                 |     | 0 (0)                  | 0 (0)                   | 2 (2.41)              | 6 (2.42)                | 7 (5.43)                 |
| Sore throat                |     | N/A                    | N/A                     | 2 (2.41)              | 13 (5.24)               | 13 (10.08)               |
| Hyposmia and/or ageusia    |     | N/A                    | N/A                     | 0 (0)                 | 20 (8.06)               | 26 (20.16)               |
| Fatigue                    |     | 1 (7.69)               | 1 (2.78)                | 8 (9.64)              | 43 (17.34)              | 26 (20.16)               |
| Headache                   |     | N/A                    | N/A                     | 2 (2.41)              | 49 (19.76)              | 29 (22.48)               |
| Abdominal pain             |     | 0 (0)                  | 0 (0)                   | 3 (3.61)              | 10 (4.03)               | 2 (1.55)                 |
| Nausea/vomiting            |     | 0 (0)                  | 1 (2.78)                | 2 (2.41)              | 12 (4.84)               | 8 (6.2)                  |
| Diarrhea                   |     | 0 (0)                  | 7 (19.44)               | 8 (9.64)              | 15 (6.05)               | 9 (6.98)                 |
| Poor feeding               |     | 2 (15.38)              | 4 (11.11)               | 5 (6.02)              | 7 (2.82)                | 2 (1.55)                 |
| Number of symptoms         |     |                        |                         |                       |                         |                          |
|                            | 0   | 1 (7.69)               | 8 (22.22)               | 20 (24.1)             | 82 (33.06)              | 28 (21.71)               |
|                            | 1   | 6 (46.15)              | 11 (30.56)              | 24 (28.92)            | 60 (24.19)              | 33 (25.58)               |
|                            | 2   | 3 (23.08)              | 10 (27.78)              | 16 (19.28)            | 46 (18.55)              | 29 (22.48)               |
|                            | ≥ 3 | 3 (23.08)              | 7 (19.44)               | 23 (27.71)            | 60 (24.19)              | 39 (30.23)               |
| Duration of symptoms, days |     |                        |                         |                       |                         |                          |
|                            |     | 2 (1 - 5)              | 3 (2 - 7)               | 3 (1 - 6)             | 3 (1 - 5)               | 3 (1 - 7)                |

N/A = not assessed.

**Supplementary Table 3.** Clinical features of COVID-19 among different age groups (0-2, 3-4, 5-11, and 12-20 years), overall (N=509) and stratified according to the variant of concern (VOC) (Parental=387, Delta=52, Omicron=70).

|                                          | 0 - 2 years | 3 - 4 years | 5 - 11 years | 12 - 20 years | P-value  |
|------------------------------------------|-------------|-------------|--------------|---------------|----------|
| Rhinitis – Overall, N (%)                | 25 (29.41)  | 15 (23.44)  | 36 (15.58)   | 29 (22.48)    | 0.0426   |
| Parental                                 | 15 (22.39)  | 9 (19.15)   | 16 (9.7)     | 22 (20.37)    | 0.0323   |
| Delta                                    | 3 (37.5)    | 4 (57.14)   | 8 (27.59)    | 2 (25)        | 0.0107   |
| Omicron                                  | 7 (70)      | 2 (20)      | 12 (32.43)   | 5 (38.46)     | 0.0012   |
| Cough - Overall, N (%)                   | 17 (20)     | 12 (18.75)  | 26 (11.26)   | 20 (15.5)     | 0.173    |
| Parental                                 | 9 (13.43)   | 7 (14.89)   | 9 (5.45)     | 12 (11.11)    | 0.1011   |
| Delta                                    | 5 (62.5)    | 1 (14.29)   | 5 (17.24)    | 3 (37.5)      | 0.0015   |
| Omicron                                  | 3 (30)      | 4 (40)      | 12 (32.43)   | 5 (38.46)     | 0.0171   |
| Dyspnea - Overall, N (%)                 | 2 (2.35)    | 0 (0)       | 2 (0.87)     | 3 (2.33)      | 0.0197   |
| Parental                                 | 2 (2.99)    | 0 (0)       | 2 (1.21)     | 1 (0.93)      | 0.0458   |
| Delta                                    | 0 (0)       | 0 (0)       | 0 (0)        | 0 (0)         | -        |
| Omicron                                  | 0 (0)       | 0 (0)       | 0 (0)        | 2 (15.38)     | 0.0323   |
| Fever - Overall, N (%)                   | 54 (63.53)  | 31 (48.44)  | 91 (39.39)   | 62 (48.06)    | 0.002    |
| Parental                                 | 41 (61.19)  | 18 (38.3)   | 51 (30.91)   | 48 (44.44)    | 0.0003   |
| Delta                                    | 4 (50)      | 5 (71.43)   | 13 (44.83)   | 5 (62.5)      | 0.0117   |
| Omicron                                  | 9 (90)      | 8 (80)      | 27 (72.97)   | 9 (69.23)     | 0.0142   |
| Otalgia - Overall, N (%)                 | 1 (1.18)    | 1 (1.56)    | 0 (0)        | 0 (0)         | 0.0421   |
| Parental                                 | 1 (1.49)    | 0 (0)       | 0 (0)        | 0 (0)         | 0.1731   |
| Delta                                    | 0 (0)       | 1 (14.29)   | 0 (0)        | 0 (0)         | 0.1346   |
| Omicron                                  | 0 (0)       | 0 (0)       | 0 (0)        | 0 (0)         | -        |
| Myalgia - Overall, N (%)                 | 0 (0)       | 1 (1.56)    | 10 (4.33)    | 10 (7.75)     | 0.0002   |
| Parental                                 | 0 (0)       | 1 (2.13)    | 6 (3.64)     | 7 (6.48)      | 0.0022   |
| Delta                                    | 0 (0)       | 0 (0)       | 1 (3.45)     | 1 (12.5)      | 0.175    |
| Omicron                                  | 0 (0)       | 0 (0)       | 3 (8.11)     | 2 (15.38)     | 0.0501   |
| Arthralgia - Overall, N (%)              | 0 (0)       | 3 (4.69)    | 5 (2.16)     | 7 (5.43)      | 0.0009   |
| Parental                                 | 0 (0)       | 3 (6.38)    | 5 (3.03)     | 5 (4.63)      | 0.0030   |
| Delta                                    | 0 (0)       | 0 (0)       | 0 (0)        | 0 (0)         | -        |
| Omicron                                  | 0 (0)       | 0 (0)       | 0 (0)        | 2 (15.38)     | 0.0323   |
| Sore throat - Overall, N (%)             | 1 (1.18)    | 1 (1.56)    | 13 (5.63)    | 13 (10.08)    | < 0.0001 |
| Parental                                 | 1 (1.49)    | 0 (0)       | 6 (3.64)     | 10 (9.26)     | 0.0003   |
| Delta                                    | 0 (0)       | 0 (0)       | 0 (0)        | 1 (12.5)      | 0.1538   |
| Omicron                                  | 0 (0)       | 1 (10)      | 7 (18.92)    | 2 (15.38)     | 0.0202   |
| Hyposmia and/or ageusia - Overall, N (%) | 0 (0)       | 1 (1.56)    | 19 (8.23)    | 26 (20.16)    | < 0.0001 |
| Parental                                 | 0 (0)       | 1 (2.13)    | 16 (9.7)     | 21 (19.44)    | < 0.0001 |
| Delta                                    | 0 (0)       | 0 (0)       | 2 (6.9)      | 3 (37.5)      | 0.0087   |
| Omicron                                  | 0 (0)       | 0 (0)       | 1 (2.7)      | 2 (15.38)     | 0.0527   |
| Conjunctivitis - Overall, N (%)          | 2 (2.35)    | 2 (3.13)    | 5 (2.16)     | 3 (2.33)      | 0.0238   |
| Parental                                 | 2 (2.99)    | 1 (2.13)    | 4 (2.42)     | 3 (2.78)      | 0.0342   |
| Delta                                    | 0 (0)       | 0 (0)       | 1 (3.45)     | 0 (0)         | 0.5577   |
| Omicron                                  | 0 (0)       | 1 (10)      | 0 (0)        | 0 (0)         | 0.1429   |
| Fatigue - Overall, N (%)                 | 5 (5.88)    | 8 (12.5)    | 40 (17.32)   | 26 (20.16)    | 0.0274   |
| Parental                                 | 4 (5.97)    | 3 (6.38)    | 27 (16.36)   | 21 (19.44)    | 0.0274   |

|                                              |          |            |            |            |            |          |
|----------------------------------------------|----------|------------|------------|------------|------------|----------|
|                                              | Delta    | 0 (0)      | 2 (28.57)  | 5 (17.24)  | 2 (25)     | 0.019    |
|                                              | Omicron  | 1 (10)     | 3 (30)     | 8 (21.62)  | 3 (23.08)  | 0.0184   |
| <hr/>                                        |          |            |            |            |            |          |
| Headache - Overall, N (%)                    |          | 0 (0)      | 3 (4.69)   | 48 (20.78) | 29 (22.48) | < 0.0001 |
|                                              | Parental | 0 (0)      | 3 (6.38)   | 29 (17.58) | 24 (22.22) | 0.0001   |
|                                              | Delta    | 0 (0)      | 0 (0)      | 6 (20.69)  | 2 (25)     | 0.0177   |
|                                              | Omicron  | 0 (0)      | 0 (0)      | 13 (35.14) | 3 (23.08)  | 0.0004   |
| <hr/>                                        |          |            |            |            |            |          |
| Alteration of consciousness - Overall, N (%) |          | 0 (0)      | 0 (0)      | 0 (0)      | 0 (0)      | -        |
|                                              | Parental | 0 (0)      | 0 (0)      | 0 (0)      | 0 (0)      | -        |
|                                              | Delta    | 0 (0)      | 0 (0)      | 0 (0)      | 0 (0)      | -        |
|                                              | Omicron  | 0 (0)      | 0 (0)      | 0 (0)      | 0 (0)      | -        |
| <hr/>                                        |          |            |            |            |            |          |
| Abdominal pain - Overall, N (%)              |          | 0 (0)      | 4 (6.25)   | 9 (3.9)    | 2 (1.55)   | 0.0009   |
|                                              | Parental | 0 (0)      | 3 (6.38)   | 8 (4.85)   | 2 (1.85)   | 0.0019   |
|                                              | Delta    | 0 (0)      | 0 (0)      | 1 (3.45)   | 0 (0)      | 0.5577   |
|                                              | Omicron  | 0 (0)      | 1 (10)     | 0 (0)      | 0 (0)      | 0.1429   |
| <hr/>                                        |          |            |            |            |            |          |
| Nausea/vomiting - Overall, N (%)             |          | 3 (3.53)   | 1 (1.56)   | 11 (4.76)  | 8 (6.2)    | 0.0045   |
|                                              | Parental | 3 (4.48)   | 0 (0)      | 6 (3.64)   | 7 (6.48)   | 0.0039   |
|                                              | Delta    | 0 (0)      | 0 (0)      | 2 (6.9)    | 0 (0)      | 0.3062   |
|                                              | Omicron  | 0 (0)      | 1 (10)     | 3 (8.11)   | 1 (7.69)   | 0.0835   |
| <hr/>                                        |          |            |            |            |            |          |
| Diarrhea - Overall, N (%)                    |          | 12 (14.12) | 5 (7.81)   | 13 (5.63)  | 9 (6.98)   | 0.0918   |
|                                              | Parental | 9 (13.43)  | 4 (8.51)   | 11 (6.67)  | 7 (6.48)   | 0.3291   |
|                                              | Delta    | 0 (0)      | 1 (14.29)  | 2 (6.9)    | 1 (12.5)   | 0.084    |
|                                              | Omicron  | 3 (30)     | 0 (0)      | 0 (0)      | 1 (7.69)   | 0.0017   |
| <hr/>                                        |          |            |            |            |            |          |
| Poor feeding - Overall, N (%)                |          | 7 (8.24)   | 5 (7.81)   | 6 (2.6)    | 2 (1.55)   | 0.0002   |
|                                              | Parental | 6 (8.96)   | 4 (8.51)   | 3 (1.82)   | 2 (1.85)   | 0.0002   |
|                                              | Delta    | 0 (0)      | 0 (0)      | 1 (3.45)   | 0 (0)      | 0.5577   |
|                                              | Omicron  | 1 (10)     | 1 (10)     | 2 (5.41)   | 0 (0)      | 0.0726   |
| <hr/>                                        |          |            |            |            |            |          |
| Lymphadenopathy - Overall, N (%)             |          | 0 (0)      | 0 (0)      | 1 (0.43)   | 0 (0)      | 0.4538   |
|                                              | Parental | 0 (0)      | 0 (0)      | 1 (0.61)   | 0 (0)      | 0.4264   |
|                                              | Delta    | 0 (0)      | 0 (0)      | 0 (0)      | 0 (0)      | -        |
|                                              | Omicron  | 0 (0)      | 0 (0)      | 0 (0)      | 0 (0)      | -        |
| <hr/>                                        |          |            |            |            |            |          |
| Skin rash - Overall, N (%)                   |          | 1 (1.18)   | 3 (4.69)   | 4 (1.73)   | 4 (3.1)    | 0.0081   |
|                                              | Parental | 1 (1.49)   | 2 (4.26)   | 4 (2.42)   | 4 (3.7)    | 0.0183   |
|                                              | Delta    | 0 (0)      | 1 (14.29)  | 0 (0)      | 0 (0)      | 0.1346   |
|                                              | Omicron  | 0 (0)      | 0 (0)      | 0 (0)      | 0 (0)      | -        |
| <hr/>                                        |          |            |            |            |            |          |
| Pneumonia - Overall, N (%)                   |          | 0 (0)      | 0 (0)      | 2 (0.87)   | 1 (0.78)   | 0.1568   |
|                                              | Parental | 0 (0)      | 0 (0)      | 2 (1.21)   | 0 (0)      | 0.1811   |
|                                              | Delta    | 0 (0)      | 0 (0)      | 0 (0)      | 0 (0)      | -        |
|                                              | Omicron  | 0 (0)      | 0 (0)      | 0 (0)      | 1 (7.69)   | 0.1857   |
| <hr/>                                        |          |            |            |            |            |          |
| Other symptoms - Overall, N (%)              |          | 7 (8.24)   | 5 (7.81)   | 10 (4.33)  | 13 (10.08) | 0.192    |
|                                              | Parental | 4 (5.97)   | 4 (8.51)   | 9 (5.45)   | 11 (10.19) | 0.0027   |
|                                              | Delta    | 1 (12.5)   | 0 (0)      | 0 (0)      | 1 (12.5)   | 0.0483   |
|                                              | Omicron  | 2 (20)     | 1 (10)     | 1 (2.7)    | 1 (7.69)   | 0.0179   |
| <hr/>                                        |          |            |            |            |            |          |
| Number of symptoms - Overall, N (%)          |          |            |            |            |            |          |
|                                              | 0        | 15 (17.65) | 20 (31.25) | 76 (32.9)  | 28 (21.71) |          |
|                                              | 1        | 30 (35.29) | 13 (20.31) | 58 (25.11) | 33 (25.58) |          |
|                                              | 2        | 19 (22.35) | 14 (21.88) | 42 (18.18) | 29 (22.48) | 0.1426   |
|                                              | ≥ 3      | 21 (24.71) | 17 (26.56) | 55 (23.81) | 39 (30.23) |          |

|                            |          |             |            |             |            |          |
|----------------------------|----------|-------------|------------|-------------|------------|----------|
| Parental                   |          |             |            |             |            |          |
|                            | 0        | 12 (17.91)  | 19 (40.43) | 67 (40.61)  | 26 (24.07) |          |
|                            | 1        | 27 (40.3)   | 8 (17.02)  | 43 (26.06)  | 32 (29.63) |          |
|                            | 2        | 16 (23.88)  | 9 (19.15)  | 22 (13.33)  | 22 (20.37) | 0.008    |
|                            | ≥ 3      | 12 (17.91)  | 11 (23.4)  | 33 (20)     | 28 (25.93) |          |
| Delta                      |          |             |            |             |            |          |
|                            | 0        | 3 (37.5)    | 0 (0)      | 8 (27.59)   | 2 (25)     |          |
|                            | 1        | 1 (12.5)    | 3 (42.86)  | 6 (20.69)   | 0 (0)      |          |
|                            | 2        | 1 (12.5)    | 2 (28.57)  | 9 (31.03)   | 2 (25)     | < 0.0001 |
|                            | ≥ 3      | 3 (37.5)    | 2 (28.57)  | 6 (20.69)   | 4 (50)     |          |
| Omicron                    |          |             |            |             |            |          |
|                            | 0        | 0 (0)       | 1 (10)     | 1 (2.7)     | 0 (0)      |          |
|                            | 1        | 2 (20)      | 2 (20)     | 9 (24.32)   | 1 (7.69)   |          |
|                            | 2        | 2 (20)      | 3 (30)     | 11 (29.73)  | 5 (38.46)  | < 0.0001 |
|                            | ≥ 3      | 6 (60)      | 4 (40)     | 16 (43.24)  | 7 (53.85)  |          |
| Duration of symptoms, days |          |             |            |             |            |          |
|                            | Overall  | 3 (1 - 6)   | 3 (1 - 7)  | 2.5 (1 - 5) | 3 (1 - 7)  | 0.4714   |
|                            | parental | 3 (1 - 7)   | 3 (1 - 5)  | 3 (1 - 5)   | 3 (1 - 7)  | 0.9248   |
|                            | Delta    | 5 (3 - 7)   | 7 (7 - 19) | 2 (1 - 2)   | 7 (2 - 13) | 0.1442   |
|                            | Omicron  | 2 (0 - 3.5) | 2 (1 - 3)  | 2 (1 - 4)   | 6 (1 - 9)  | 0.3136   |

**Supplementary Table 4.** Clinical features of SARS-CoV-2 infection in children with at least one underlying disease compare with healthy subjects, overall, and stratified according to the variant of concern (VOC).

| Comorbidities                    | Overall (N=509) |            | P-value | Parental (N = 387) |             | Delta (N = 52) |            | Omicron (N = 70) |            |
|----------------------------------|-----------------|------------|---------|--------------------|-------------|----------------|------------|------------------|------------|
|                                  | 0               | At least 1 |         | 0                  | At least 1  | 0              | At least 1 | 0                | At least 1 |
| <b>Symptoms, N (%)</b>           |                 |            |         |                    |             |                |            |                  |            |
| Rhinitis                         | 73 (18.72)      | 32 (26.89) | 0.0538  | 47 (15.51)         | 15 (17.86)  | 10 (24.39)     | 7 (63.64)  | 16 (34.78)       | 10 (41.67) |
| Cough                            | 48 (12.31)      | 27 (22.69) | 0.0052  | 24 (7.92)          | 13 (15.48)  | 11 (26.83)     | 3 (27.27)  | 13 (28.26)       | 11 (45.83) |
| Dyspnea                          | 3 (0.77)        | 4 (3.36)   | 0.0462  | 3 (0.99)           | 2 (2.38)    | 0 (0)          | 0 (0)      | 0 (0)            | 2 (8.33)   |
| Fever                            | 174 (44.62)     | 64 (53.78) | 0.0794  | 121 (39.93)        | 37 (44.05)  | 20 (48.78)     | 7 (63.64)  | 33 (71.74)       | 20 (83.33) |
| Otalgia                          | 2 (0.51)        | 0 (0)      | 0.5867  | 1 (0.33)           | 0 (0)       | 1 (2.44)       | 0 (0)      | 0 (0)            | 0 (0)      |
| Myalgia                          | 14 (3.59)       | 7 (5.88)   | 0.107   | 11 (3.63)          | 3 (3.57)    | 2 (4.88)       | 0 (0)      | 1 (2.17)         | 4 (16.67)  |
| Arthralgia                       | 11 (2.82)       | 4 (3.36)   | 0.2212  | 10 (3.3)           | 3 (3.57)    | 0 (0)          | 0 (0)      | 1 (2.17)         | 1 (4.17)   |
| Sore throat                      | 22 (5.64)       | 6 (5.04)   | 0.8019  | 14 (4.62)          | 3 (3.57)    | 1 (2.44)       | 0 (0)      | 7 (15.22)        | 3 (12.5)   |
| Hyposmia and/or ageusia          | 33 (8.46)       | 13 (10.92) | 0.4121  | 29 (9.57)          | 9 (10.71)   | 4 (9.76)       | 1 (9.09)   | 0 (0)            | 3 (12.5)   |
| Conjunctivitis                   | 9 (2.31)        | 3 (2.52)   | 0.259   | 8 (2.64)           | 2 (2.38)    | 0 (0)          | 1 (9.09)   | 1 (2.17)         | 0 (0)      |
| Fatigue                          | 65 (16.67)      | 14 (11.76) | 0.1961  | 46 (15.18)         | 9 (10.71)   | 7 (17.07)      | 2 (18.18)  | 12 (26.09)       | 3 (12.5)   |
| Headache                         | 62 (15.9)       | 18 (15.13) | 0.8396  | 44 (14.52)         | 12 (14.29)  | 5 (12.2)       | 3 (27.27)  | 13 (28.26)       | 3 (12.5)   |
| Alteration of consciousness      | 0 (0)           | 0 (0)      | -       | 0 (0)              | 0 (0)       | 0 (0)          | 0 (0)      | 0 (0)            | 0 (0)      |
| Abdominal pain                   | 11 (2.82)       | 4 (3.36)   | 0.2212  | 9 (2.97)           | 4 (4.76)    | 1 (2.44)       | 0 (0)      | 1 (2.17)         | 0 (0)      |
| Nausea/vomiting                  | 15 (3.85)       | 8 (6.72)   | 0.186   | 11 (3.63)          | 5 (5.95)    | 2 (4.88)       | 0 (0)      | 2 (4.35)         | 3 (12.5)   |
| Diarrhea                         | 28 (7.18)       | 11 (9.24)  | 0.4587  | 22 (7.26)          | 9 (10.71)   | 3 (7.32)       | 1 (9.09)   | 3 (6.52)         | 1 (4.17)   |
| Poor feeding                     | 16 (4.1)        | 4 (3.36)   | 0.2074  | 12 (3.96)          | 3 (3.57)    | 1 (2.44)       | 0 (0)      | 3 (6.52)         | 1 (4.17)   |
| Lymphadenopathy                  | 1 (0.26)        | 0 (0)      | 0.7662  | 1 (0.33)           | 0 (0)       | 0 (0)          | 0 (0)      | 0 (0)            | 0 (0)      |
| Skin rash                        | 9 (2.31)        | 3 (2.52)   | 0.2590  | 8 (2.64)           | 3 (3.57)    | 1 (2.44)       | 0 (0)      | 0 (0)            | 0 (0)      |
| Pneumonia                        | 0 (0)           | 3 (2.52)   | 0.0125  | 0 (0)              | 2 (2.38)    | 0 (0)          | 0 (0)      | 0 (0)            | 1 (4.17)   |
| Other symptoms                   | 23 (5.9)        | 12 (10.08) | 0.1142  | 20 (6.6)           | 8 (9.52)    | 1 (2.44)       | 1 (9.09)   | 2 (4.35)         | 3 (12.5)   |
| <b>Number of symptoms, N (%)</b> |                 |            |         |                    |             |                |            |                  |            |
| 0                                | 117 (30)        | 22 (18.49) |         | 102 (33.66)        | 22 (26.19)  | 13 (31.71)     | 0 (0)      | 2 (4.35)         | 0 (0)      |
| 1                                | 98 (25.13)      | 36 (30.25) | 0.0906  | 83 (27.39)         | 27 (32.14)  | 7 (17.07)      | 3 (27.27)  | 8 (17.39)        | 6 (25)     |
| 2                                | 79 (20.26)      | 25 (21.01) |         | 53 (17.49)         | 16 (19.05)  | 10 (24.39)     | 4 (36.36)  | 16 (34.78)       | 5 (20.83)  |
| ≥ 3                              | 96 (24.62)      | 36 (30.25) |         | 65 (21.45)         | 19 (22.62)  | 11 (26.83)     | 4 (36.36)  | 20 (43.48)       | 13 (54.17) |
| <b>Duration of symptoms</b>      |                 |            |         |                    |             |                |            |                  |            |
| days                             | 3 (1 - 5)       | 3 (1 - 7)  | 0.3302  | 3 (1 - 5)          | 2 (1 - 6.5) | 2 (1.5 - 7)    | 7 (2 - 12) | 1.5 (0.5 - 3)    | 4 (2 - 7)  |



**Supplementary Table 5.** Impact on COVID-19 clinical manifestations of influenza and rotavirus immunization status.

|                                  | Flu Vaccine*    |                 |         | Rotavirus**     |                  |         |
|----------------------------------|-----------------|-----------------|---------|-----------------|------------------|---------|
|                                  | No<br>(N = 327) | Yes<br>(N = 59) | P-value | No<br>(N = 148) | Yes<br>(N = 353) | P-value |
| <b>Symptoms, N (%)</b>           |                 |                 |         |                 |                  |         |
| Rhinitis                         | 58 (17.74)      | 10 (16.95)      | 0.8838  | 22 (14.86)      | 80 (22.66)       | 0.048   |
| Cough                            | 35 (10.7)       | 10 (16.95)      | 0.1688  | 23 (15.54)      | 51 (14.45)       | 0.7531  |
| Dyspnea                          | 5 (1.53)        | 0 (0)           | 0.4343  | 2 (1.35)        | 4 (1.13)         | 0.3246  |
| Fever                            | 144 (44.04)     | 24 (40.68)      | 0.632   | 69 (46.62)      | 164 (46.46)      | 0.9734  |
| Otalgia                          | 2 (0.61)        | 0 (0)           | 0.7173  | 1 (0.68)        | 1 (0.28)         | 0.4171  |
| Myalgia                          | 14 (4.28)       | 3 (5.08)        | 0.2438  | 3 (2.03)        | 18 (5.1)         | 0.1175  |
| Arthralgia                       | 11 (3.36)       | 0 (0)           | 0.1571  | 2 (1.35)        | 13 (3.68)        | 0.0949  |
| Sore throat                      | 15 (4.59)       | 4 (6.78)        | 0.1794  | 7 (4.73)        | 21 (5.95)        | 0.5878  |
| Hyposmia and/or ageusia          | 33 (10.09)      | 6 (10.17)       | 0.9854  | 11 (7.43)       | 35 (9.92)        | 0.38    |
| Conjunctivitis                   | 9 (2.75)        | 0 (0)           | 0.2209  | 3 (2.03)        | 8 (2.27)         | 0.261   |
| Fatigue                          | 48 (14.68)      | 9 (15.25)       | 0.9087  | 18 (12.16)      | 61 (17.28)       | 0.1515  |
| Headache                         | 45 (13.76)      | 8 (13.56)       | 0.9669  | 20 (13.51)      | 60 (17)          | 0.3315  |
| Alteration of consciousness      | 0 (0)           | 0 (0)           | -       | 0 (0)           | 0 (0)            | -       |
| Abdominal pain                   | 11 (3.36)       | 1 (1.69)        | 0.2966  | 5 (3.38)        | 10 (2.83)        | 0.2067  |
| Nausea/vomiting                  | 13 (3.98)       | 2 (3.39)        | 0.2887  | 8 (5.41)        | 15 (4.25)        | 0.5727  |
| Diarrhea                         | 25 (7.65)       | 2 (3.39)        | 0.1262  | 15 (10.14)      | 24 (6.8)         | 0.2035  |
| Poor feeding                     | 10 (3.06)       | 3 (5.08)        | 0.1971  | 4 (2.7)         | 15 (4.25)        | 0.4083  |
| Lymphadenopathy                  | 1 (0.31)        | 0 (0)           | 0.8472  | 0 (0)           | 1 (0.28)         | 0.7046  |
| Skin rash                        | 9 (2.75)        | 3 (5.08)        | 0.1783  | 7 (4.73)        | 5 (1.42)         | 0.0259  |
| Pneumonia                        | 1 (0.31)        | 0 (0)           | 0.8472  | 2 (1.35)        | 1 (0.28)         | 0.1843  |
| Other symptoms                   | 17 (5.2)        | 5 (8.47)        | 0.1327  | 12 (8.11)       | 22 (6.23)        | 0.4463  |
| <b>Number of symptoms, N (%)</b> |                 |                 |         |                 |                  |         |
| 0                                | 104 (31.80)     | 18 (30.51)      | 0.2463  | 45 (30.41)      | 93 (26.35)       | 0.7144  |
| 1                                | 86 (26.30)      | 14 (23.73)      |         | 39 (26.35)      | 91 (25.78)       |         |
| 2                                | 59 (18.04)      | 17 (28.81)      |         | 30 (20.27)      | 73 (20.68)       |         |
| ≥ 3                              | 78 (23.85)      | 10 (16.95)      |         | 34 (22.97)      | 96 (27.20)       |         |
| <b>Duration of symptoms</b>      |                 |                 |         |                 |                  |         |
| days                             | 3 (1 - 7)       | 2 (0 - 4)       | 0.0955  | 3 (1 - 7)       | 3 (1 - 6)        | 0.9879  |

\* Patients aged at least 6 months, 96 missing values are handled in the analysis; \*\*Patients aged more than 61 days
